# Supplementary material
Source: PubMed Central journal article supplement (PMC4079369)
Supplement: supp_tpc.114.123059_tpc123059_Supplemental_Data.pdf [file supp_tpc.114.123059_tpc123059_Supplemental_Data.pdf]

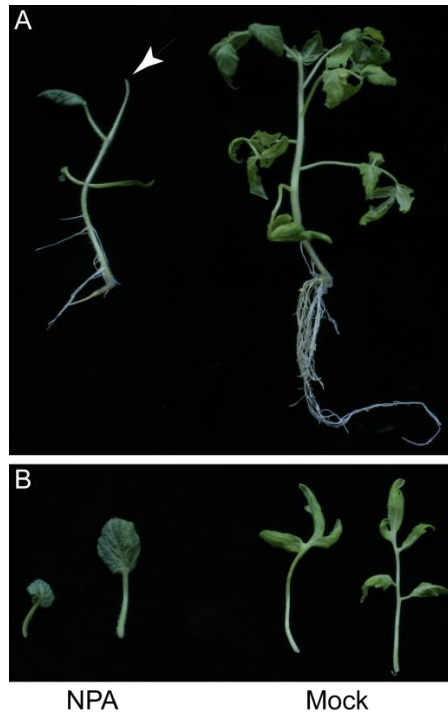

**Supplemental Figure1:** Mock and NPA-treated tomato plants.

(A) NPA treated tomato (cv. Moneymaker) developed a pin-like inflorescence (arrowhead).  
(B) Comparison of first and second leaves from mock and NPA treated tomato plants. NPA-treated plants had simpler leaves.

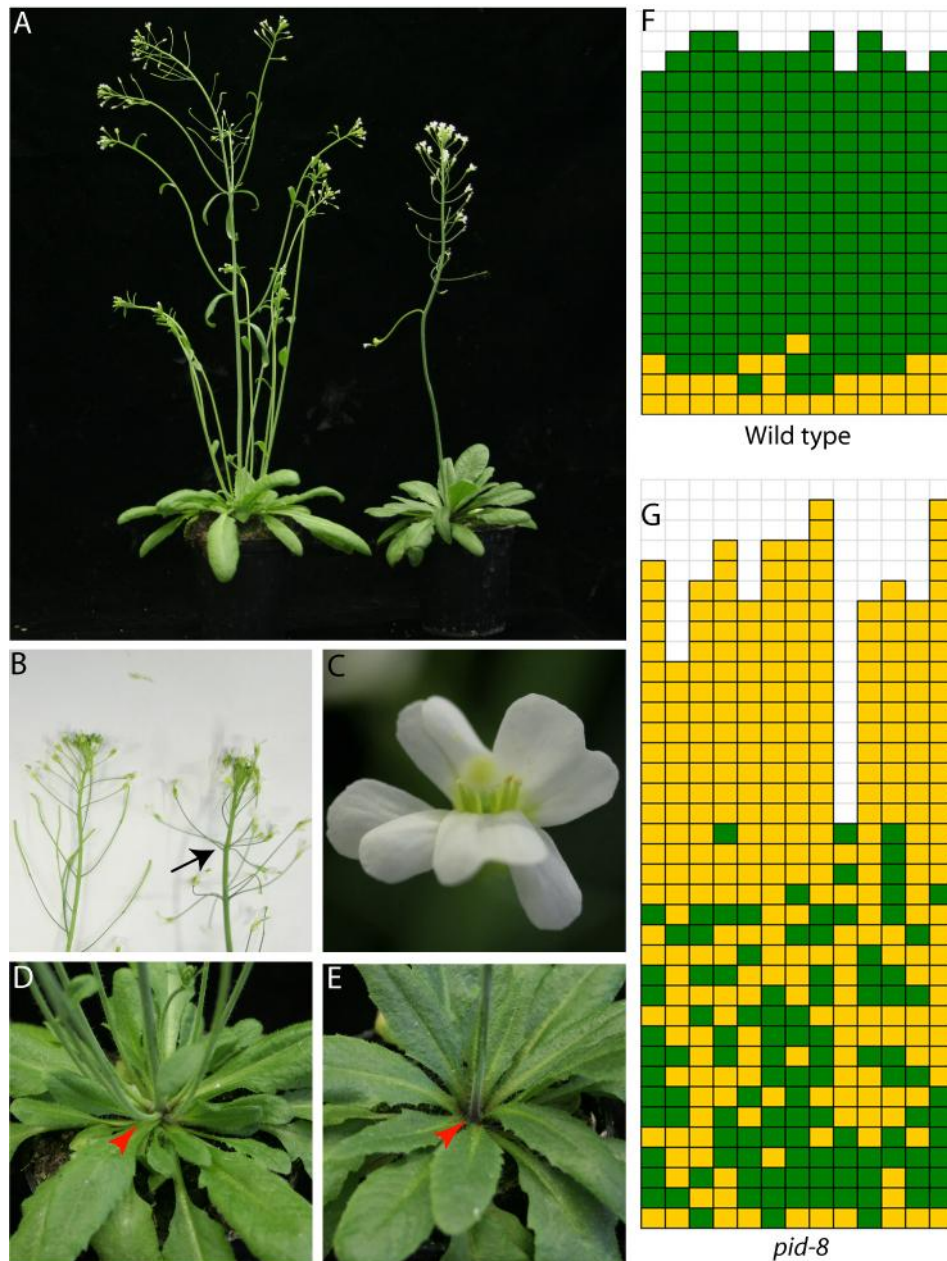

**Supplemental Figure 2:** Phenotype of *pid-8* mutant plants.

(A) Habitus of a *Ws* wild type plant (left) and a *pid-8* mutant (right). Plants were grown for 28 days under SD conditions and then shifted to LD to induce flowering. (B) Comparison of an inflorescence between *Ws* (left) and *pid-8* (right), arrow points to a cluster of flowers. (D) Close-up view of a *pid-8* flower. (D, E) Close-up view of a *Ws* and a *pid-8* rosette. In *Ws*, side shoots are formed (D, arrowhead) while in *pid-8* most leaf axils are empty (E, arrowhead). (F-G) Schematic representation of axillary bud formation in rosette leaf axils of *pid-8* (G) in comparison to the *Ws* wild type (F, n=13). Plants were grown for 28 days under SD conditions and then shifted to LD to induce flowering. Each column represents a single plant and each square within a column representing an individual leaf axil. The bottom row represents the oldest rosette leaf axils, with positions of progressively younger rosette leaves on top of it. Green denotes the presence of an axillary bud and yellow the absence of an axillary bud in any particular leaf axil.

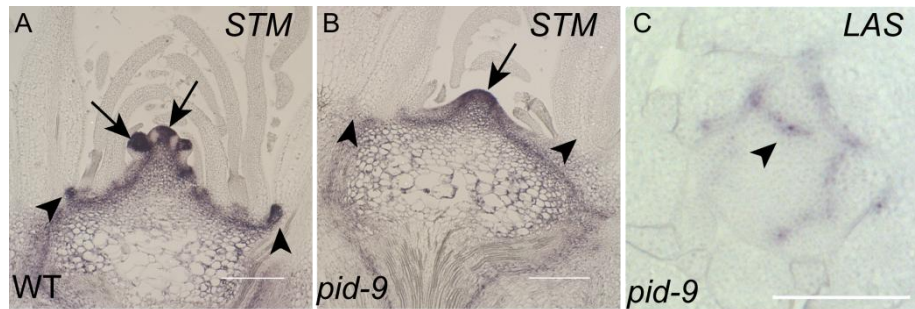

**Supplemental Figure 3:** *STM* and *LAS* transcript accumulation in apices of Arabidopsis wild type and *pid-9* mutant plants.

(A, B) Longitudinal sections through shoot apices of Col-0 wild type (A) and *pid-9* (B) plants were hybridized with a *STM* antisense probe. Sections were prepared from plants grown under SD conditions for 28 days and shift to LD for 7 days before fixation. In both wild type and *pid-9* plants, *STM* mRNA is detected in the inflorescence meristem and interprimodial regions (A and B, arrows). Focused *STM* expression domains in older leaf axils was present in wild type but absent in *pid-9* (A and B, arrowheads). In addition, *pid-9* plants did not form any floral meristems and the main meristem was naked (B). (C) Transverse section through the shoot tip of *pid-9* plant was hybridized with a probe from the *LAS* gene, arrowhead indicates that *LAS* was expressed at the boundary between the SAM and leaf primordia. Probes are indicated in the upper right corner, genotypes are indicated in the bottom left corner. Scale bars: A and B 200  $\mu\text{m}$ ; C 100  $\mu\text{m}$ .

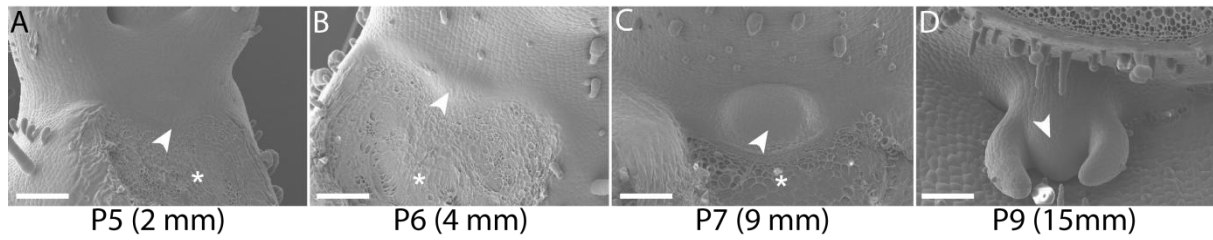

**Supplemental Figure 4:** Axillary meristem development in tomato.

(A-D) AM initiation was studied by SEM micrographs of young leaf axils from wild type tomato plants (cv. Moneymaker). Primordia of different sizes (2-9 mm) were removed from two-week-old tomato seedlings (marked with asterisks (\*)) to monitor morphological changes. Arrowheads point to an empty leaf axil (A), developing AMs (B and C) and to an axillary bud (D). Scale bars: 100  $\mu$ m.

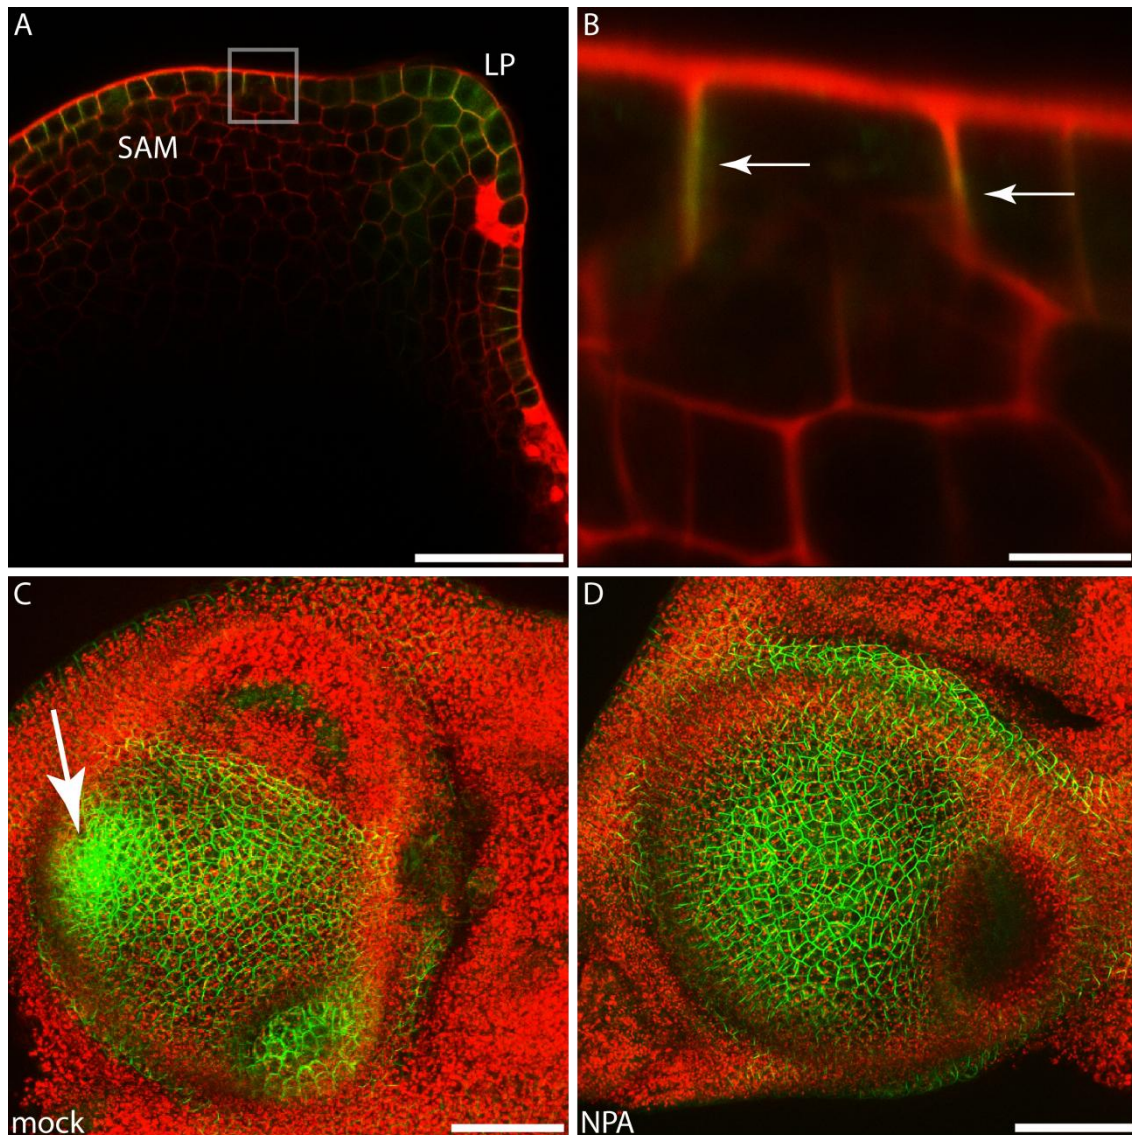

**Supplemental Figure 5:** PIN1 localization in the tomato apex.

(A) Confocal image of a tomato apex with PIN1-GFP construct. LP (leaf primordium), SAM (shoot apical meristem). (B) Close-up view of region marked in A, arrow indicate polarity of auxin flux. (C, D) 3D reconstruction of PIN1-GFP tomato apex with mock (C) and NPA (D) treatment. In C the arrow points to the incipient leaf primordium. Scale bars: A 50  $\mu\text{m}$ , B 5  $\mu\text{m}$ , C and D 100  $\mu\text{m}$ . Green indicates GFP signal, red indicates Propidium Iodide (PI, Sigma-Aldrich, USA) stained cell walls (A, B) or chlorophyll auto fluorescence (C, D).

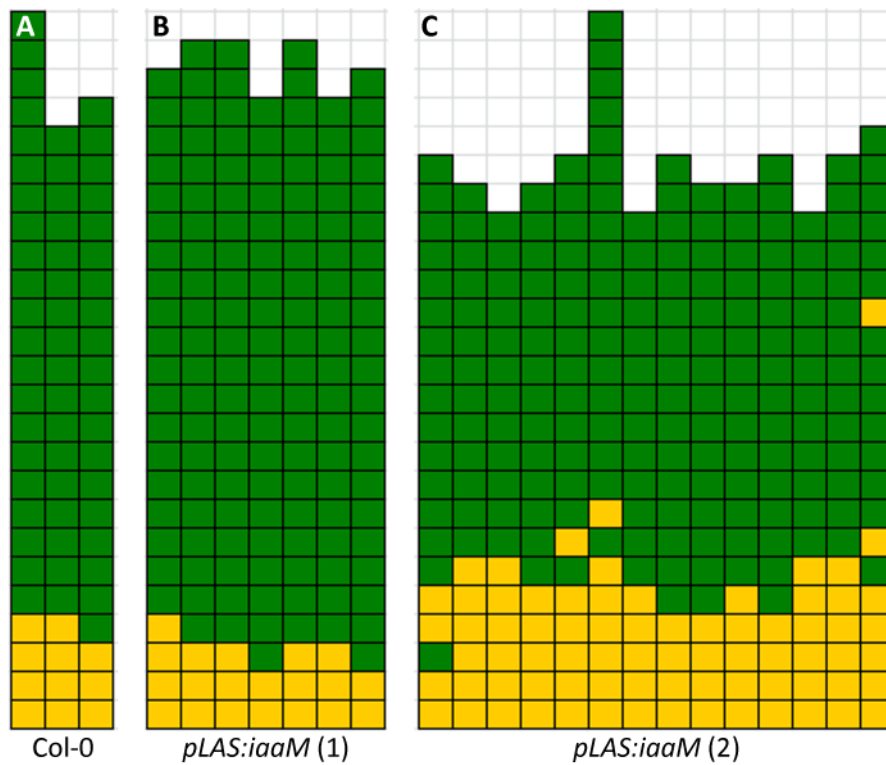

**Supplemental Figure 6:** *pLAS:iaaM* plants do not exhibit strong branching defects.

(A-C) Schematic representation of axillary bud formation in rosette leaf axils of Col-0 wild type (A, n=3) in comparison to two different *pLAS:iaaM* transgenic lines (B, n=7; C, n=14). Plants were grown under SD conditions for 28 days and then shifted to LD to induce flowering. Each column represents a single plant, with each square within a column representing an individual leaf axil. The bottom row represents the oldest rosette leaf axils, with positions of progressively younger rosette leaves on top of it. Green denotes the presence of an axillary bud and yellow the absence of an axillary bud in any particular leaf axil.

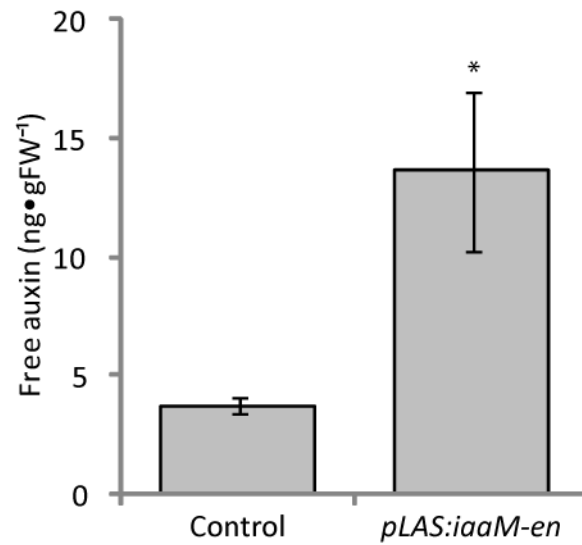

**Supplemental Figure 7:** IAA concentration in control and *pLAS:iaaM-en* plants. Bars indicate average level of free auxin in 2-week-old seedlings ( $\pm$  SE, n=6). Asterisk (\*) indicates statistically significant differences relative to control ( $p < 0.05$ ).

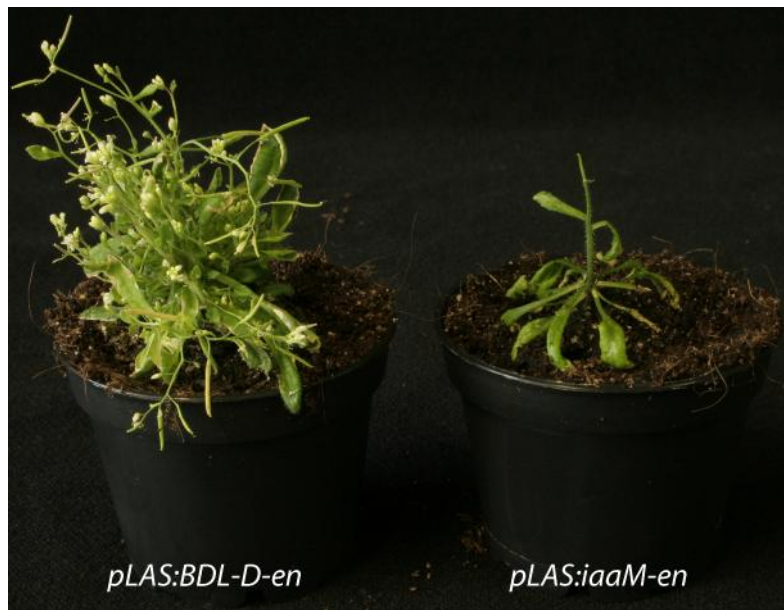

**Supplemental Figure 8:** Habitus of a *pLAS:BDL-D-en* plant (left) and a *pLAS:iaaM-en* plant (right). Plants were grown for 28 days under SD conditions and then shifted to LD to induce flowering. Images are representative of multiple plants ( $n > 10$ ).



**Supplemental Table 1. Primers**

|                     |                                             |                             |
|---------------------|---------------------------------------------|-----------------------------|
| pid-ish 5'          | ACCAACCCGTCTCTTTGTTG                        | <i>PID</i> probe            |
| pid-ish 3'-T7       | TAATACGACTCACTATAGGGAGAGCGCATGAAGCTCAAACATA | <i>PID</i> probe            |
| pid-ish 3'          | GCGCATGAAGCTCAAACATA                        | <i>PID</i> probe            |
| pid phenotype R     | ACTAGAACTTCGGCGGCATA                        | <i>pid-9</i> genotype       |
| GABI left           | ATATTGACCATCATACTCATTGC                     | <i>pid-9</i> genotype       |
| LB b1               | GCGTGGACCGCTTGCTGCAACT                      | <i>pin1</i> genotype        |
| pin1 47613 R        | AGCATGCTTTCTGCTGTGAA                        | <i>pin1</i> genotype        |
| pin1 47613 F        | TAAGGTGATGCCACCAACAA                        | <i>pin1</i> genotype        |
| BDLfor1Acc65I       | CGTGGTACCATGCGTGGTGTGTCAGAA                 | <i>BDL</i> cloning          |
| BDLRev1AvrII        | CGTCCTAGGCTAAACAGGGTTGTTTCT                 | <i>BDL</i> cloning          |
| BDLrev2mut          | TGGTGACCATCCTACCACTTG                       | <i>BDL</i> mutation         |
| BDLfor2mut          | CAAGTGGTAGGATGGTCACCA                       | <i>BDL</i> mutation         |
| iM1f-iaaMfor1Acc65I | CGTGGTACCATGTATGACCATTTTAATTCA              | <i>iaaM</i> cloning         |
| iM1r-iaaMrev1AvrII  | CGTCCTAGGTTAATAGCGATAGGAGGCGTT              | <i>iaaM</i> cloning         |
| pid-EcoRI F         | TAAGAATTCATGTTACGAGAATCAGAC                 | <i>pid-9</i> genotype       |
| PlasmidF            | CACGACGTTGTAAAACGACGGCCAG                   | <i>LAS</i> promoter cloning |
| AE42-1522R          | CATCCTAGGCATGGTACCTTGAAACGATAGAAAAAGATG     | <i>LAS</i> promoter cloning |
| 35enhan-NotIF       | CATGCGGCCGCATCACATCAATCCACTTG               | 2x35S enhancer cloning      |
| 35enhan-NotIR       | CATGCGGCCGCAACATGGTGGAGCACGAC               | 2x35S enhancer cloning      |

**Supplemental Table 2.** Cloning strategies

| Use                            | Construct                                    | Plasmid name | Insert or PCR product                    | Primers                                                    | Template                                                        | Plasmid backbone            | Cloning method |                                       |
|--------------------------------|----------------------------------------------|--------------|------------------------------------------|------------------------------------------------------------|-----------------------------------------------------------------|-----------------------------|----------------|---------------------------------------|
| Cloning vector                 | <i>LAS</i> 5' and 3' promoter ( <i>LAS</i> ) | pSR40        | 1447 bp of 5' and 4564 bp of 3' promoter | PlasmidF + AE42-1522R                                      | pAE421 <sup>1</sup>                                             | pGEM                        | aa site        |                                       |
| Cloning vector                 | <i>pLAS:iaaM</i>                             | pQW17        | <i>iaaM</i> ORF                          | iM1f- <i>iaaM</i> for1Acc65I + iM1r- <i>iaaM</i> rev1AvrII | <i>iaaM</i> construct kindly provided by Csaba Koncz            | pSR40                       | Acc65I / AvrII |                                       |
| Cloning vector                 | <i>pLAS:BDL-D</i>                            | pQW19        | C200 to T200 mutated <i>BDL</i> ORF      | Two-step PCR:                                              |                                                                 | pSR40                       | Acc65I / AvrII |                                       |
|                                |                                              |              |                                          | (1)                                                        | (a) BDLfor1Acc65I + BDLrev2mut<br>(b) BDLfor2mut + BDLRev1AvrII |                             |                | Arabidopsis cDNA                      |
|                                |                                              |              |                                          | (2)                                                        | BDLfor1Acc65I + BDLRev1AvrII                                    |                             |                | Purified PCR products pooled from (1) |
| for Arabidopsis transformation | <i>pLAS:iaaM</i>                             | pQW22        | pQW17                                    | -                                                          | -                                                               | pGPTV-Bar-AscI <sup>2</sup> | AscI           |                                       |
| for Arabidopsis transformation | <i>pLAS:BDL-D</i>                            | pQW24        | pQW19                                    | -                                                          | -                                                               | pGPTV-Bar-AscI <sup>2</sup> | AscI           |                                       |
| Cloning vector                 | <i>pLAS:iaaM-en</i>                          | pQW58        | 2x35s enhancer                           | 35enhan-NotIF + 35enhan-NotIR                              | described in Busch et al. (2011)                                | pQW17                       | NotI           |                                       |
| for Arabidopsis transformation | <i>pLAS:iaaM-en</i>                          | pQW62        | pQW58                                    | -                                                          | -                                                               | pGPTV-Bar-AscI <sup>2</sup> | AscI           |                                       |
| Cloning vector                 | <i>pLAS:BDL-D-en</i>                         | pQW59        | 2x35s enhancer                           | 35enhan-NotIF + 35enhan-NotIR                              | described in Busch et al. (2011)                                | pQW19                       | NotI           |                                       |
| for Arabidopsis transformation | <i>pLAS:BDL-D-en</i>                         | pQW63        | pQW59                                    | -                                                          | -                                                               | pGPTV-Bar-AscI <sup>2</sup> | AscI           |                                       |

<sup>1</sup> Eicker (2005)<sup>2</sup> Überlacker and Werr (1996)

Supplemental References:

- Busch, B.L., Schmitz, G., Rossmann, S., Piron, F., Ding, J., Bendahmane, A., and Theres, K.** (2011). Shoot branching and leaf dissection in tomato are regulated by homologous gene modules. *Plant Cell* **23**, 3595-3609.
- Eicker, A.** (2005). Studien zur Charakterisierung der regulatorischen Elemente des LATERAL SUPPRESSOR Gens in *Arabidopsis thaliana*. Inaugural-Dissertation, Universität zu Köln.
- Überlacker, B., and Werr, W.** (1996). Vectors with rare-cutter restriction enzyme sites for expression of open reading frames in transgenic plants. *Mol Breeding* **2**, 293-295.
